# Supplementary material for: Hydroxylation and sulfidation for nickel recovery from a spent catalyst containing the chelating agent, 2,2′-bipyridine
Source: Royal Society of Chemistry journal article supplement (doi:10.1039/d5ra00470e), 2025-01-01
Supplement: d5ra00470e1.pdf [file d5ra00470e1.pdf]

1  
2  
3  
4  
5  
6  
7  
8  
9  
10  
11  
12  
13  
14  
15  
16  
17  
18  
19  
20

## Supplementary Information

### **Hydroxylation and sulfidation for nickel recovery from a spent catalyst containing the chelating agent, 2,2'-bipyridine**

Hisanori Iwai<sup>a</sup>, Mauricio Cordova<sup>b</sup>, Yutaro Takaya<sup>c</sup>, Naoki Yokota<sup>d</sup>, Yuko Takahashi<sup>d</sup>,  
and Chiharu Tokoro<sup>b,c\*</sup>

<sup>a</sup> Sustainable Energy & Environmental Society Open Innovation Research Organization,  
Waseda University, 169-8555 Tokyo, Japan

<sup>b</sup> Department of Resources and Environmental Engineering, Faculty of Science and  
Engineering, Waseda University, 169-8555 Tokyo, Japan

<sup>c</sup> Department of System Innovation, Faculty of Engineering, The University of Tokyo,  
113-8656 Tokyo, Japan

<sup>d</sup> Next-Generation Technology Design and Creation, TAKAHATA PRECISION Co.,  
Ltd., 160-0023 Tokyo, Japan

\*Corresponding Author: tokoro@waseda.jp

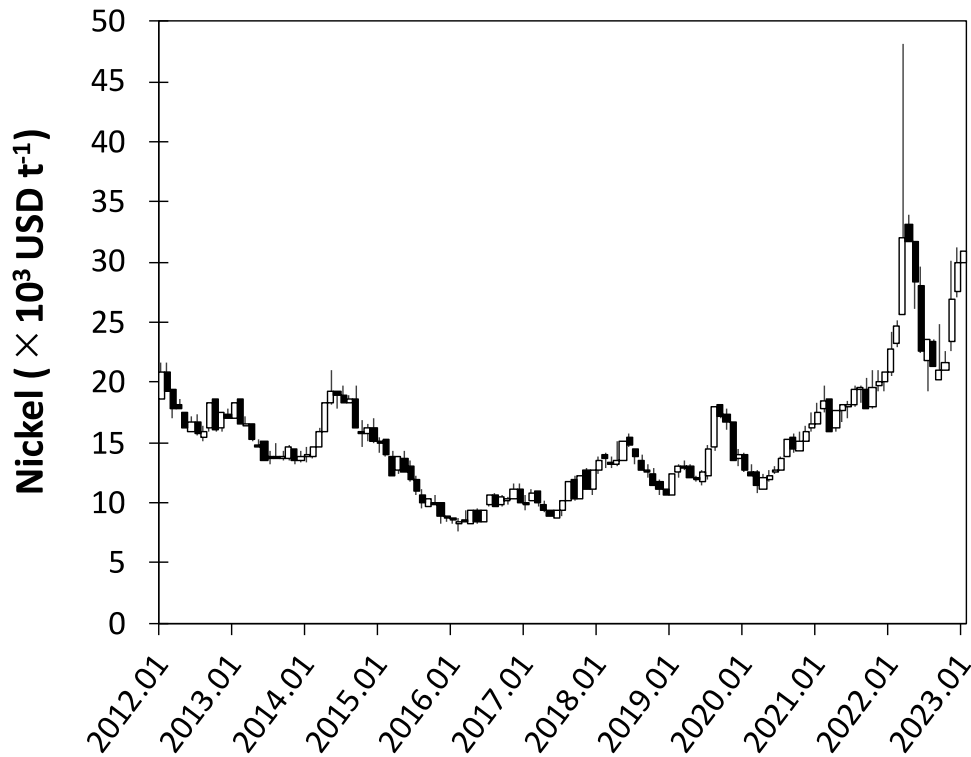

21

22

23 **Figure S1.** Candlestick chart of Ni market price at LME in the last 10 years. The  
24 monthly averaged values (Open–Close, and High–Low prices) were obtained from  
25 summarized data in TRADING ECONOMICS

26 [<https://tradingeconomics.com/commodity/nickel>, (accessed on 15, 01, 2023)].

27

28

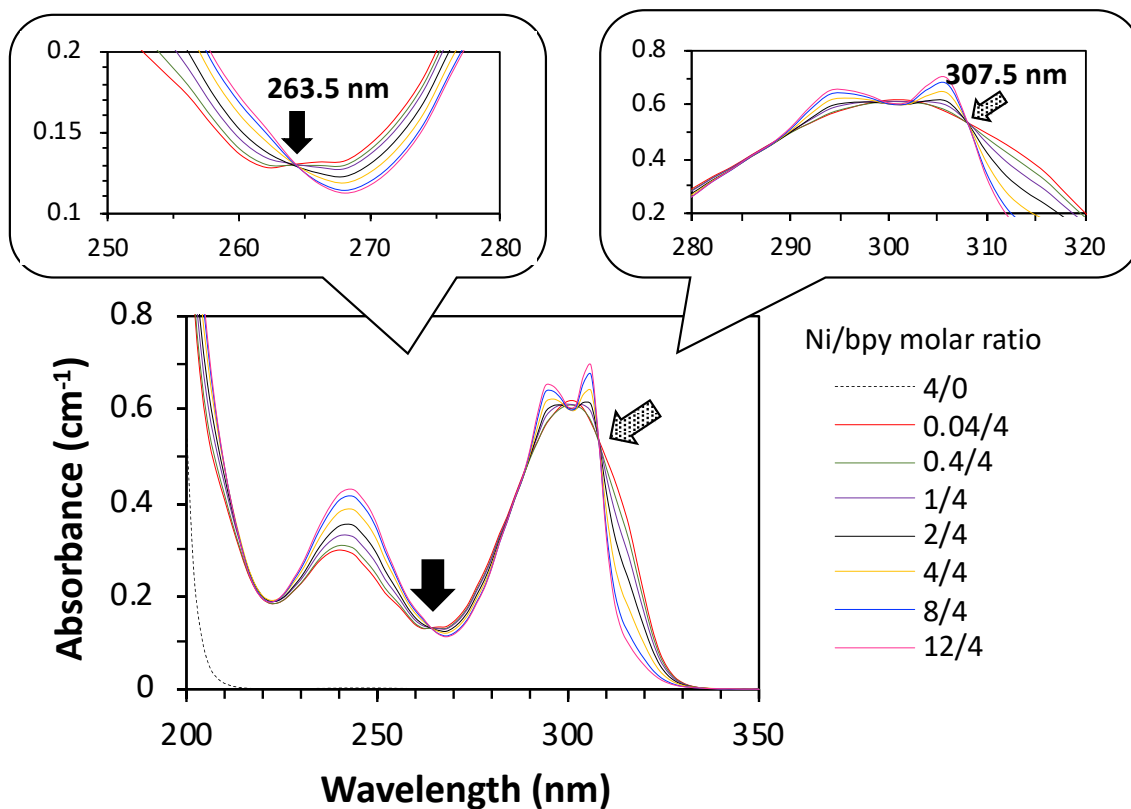

29

30

31 **Figure S2.** UV-Vis spectra of bpy (40 μM) with a various concentrations of Ni<sup>2+</sup> (0–  
 32 120 μM).

33

34

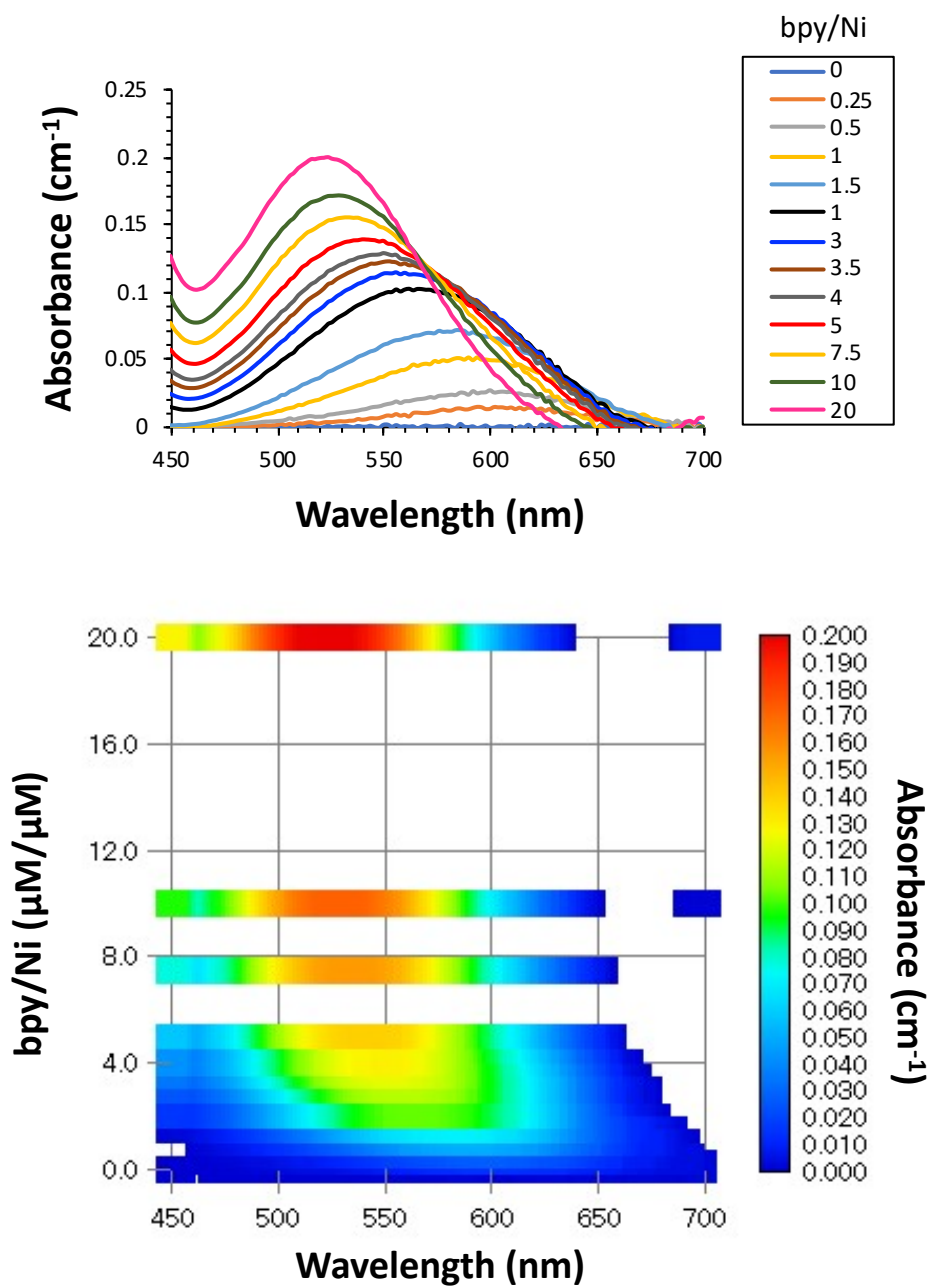

35

36

37

38 **Figure S3.** Visible range spectra of the Ni-bpy complex (upper) and the counter graph  
 39 to show the blue shift with the formation of Ni(bpy)<sub>3</sub> from Ni(bpy)<sub>1</sub> (lower). The  
 40 concentration of Ni<sup>2+</sup> was fixed at 20 μM and that of bpy was varied between 0 and 200  
 41 μM (bpy/Ni concentration ratio of 0–20 μM/μM).

42

43

44

45 **Table S1.** The PHREEQC code for calculation of Ni(OH)<sub>2</sub> precipitate<sup>a</sup>

---

**PHASES**

Fix\_H+

H+ = H+

log\_k 0.0

**SOLUTION 1**

temp 25

pH -0.5 charge

pe 4

redox pe

units mmol/kgw

density 1

Cl 3000

Ni 20

-water 1 # kg

**EQUILIBRIUM\_PHASES 1**

Ni(OH)2 0.0 0.0

**SELECTED\_OUTPUT**

-file Ni\_S

-reset false

**USER\_PUNCH 1**

-headings

-start

10 FOR i = 0 to 14 STEP 0.25

20 a\$ = EOL\$ + " USE SOLUTION 1 " + EOL\$

30 a\$ = a\$ + " EQUILIBRIUM\_PHASES 1 " + EOL\$

40 a\$ = a\$ + " Ni(OH)2 0.0 0.0 " + EOL\$

50 a\$ = a\$ + " Fix\_H+ " + STR\$(-i) + " NaOH 100 " + EOL\$

60 a\$ = a\$ + " END " + EOL\$

70 PUNCH a\$

80 NEXT i

-end

END

**USER\_PUNCH 1**

-headings

-start

-end

END

**USER\_GRAPH 1**

-headings pH total\_Ni NiCl+ Ni2OH+3 Ni(OH)2

-axis\_titles "pH" "Ni" "amount"

-chart\_title "Ni\_S"

-initial\_solutions false

-connect\_simulations true

-plot\_concentration\_vs x

-start

10 GRAPH\_X -la("H+")

20 GRAPH\_Y tot("Ni"), mol("NiCl+"), mol("Ni2OH+3"), equi("Ni(OH)2")

-end

-active true

INCLUDE\$ Ni\_S

**END**

---

<sup>a</sup> The llnl database was used for it.

46

47

48 Table S2. The PHREEQC code for calculation of NiS precipitate<sup>a</sup>

---

**PHASES**

Millerite

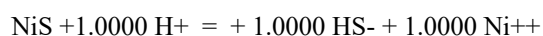

log\_k -8.0345

**SOLUTION 1**

temp 25

pH 3

pe 3

redox pe

units mmol/kgw

density 1

Cl 3000

Ni 40

-water 1 # kg

**EQUILIBRIUM\_PHASES 1**

Ni(OH)<sub>2</sub> 0.0 0.0

Millerite 0.0 0.0

H<sub>2</sub>S(g) 0.0 0.0

**USER\_GRAPH 1**

-headings Na<sub>2</sub>S pH Millerite H<sub>2</sub>S(g) Ni S(-2) Na

-chart\_title " NiS Equilibrium "

-axis\_titles " Na<sub>2</sub>S " " pH " " Amount "

#-axis\_scale x\_axis 0 14 1

#-axis\_scale y\_axis -25 0 -5

#-initial\_solutions true

-start

10 graph\_x RXN

20 graph\_y -la("H+")

30 graph\_sy EQUI("Millerite") EQUI("H<sub>2</sub>S(g)") tot("Ni") tot("S(-2)") tot("Na")

-end

**REACTION 1**

Na2S 1

0.08 moles per 100 steps

**END**

---

<sup>a</sup> The llnl database was used for it.

49
